# Supplementary material
Source: publisher figshare collection journal article supplement (https://acs.figshare.com/ndownloader/files/27454370)
Supplement: Supplementary file 1 [file 27454370]

Archive with 3 entries (3 files):
- info.xml
- pr0c00872_high_quality.mp4
- pr0c00872.pdf
