# Supplementary material
Source: publisher figshare collection journal article supplement (https://acs.figshare.com/ndownloader/files/27454370)
Supplement: Supplementary file 1 [file 27454370 › info.xml]

<presentation>
	<article>
		<title>Inflect: Optimizing Computational Workflows for Thermal Proteome Profiling Data Analysis</title>
		<doi>10.1021/acs.jproteome.0c00872</doi>
		<copyright>American Chemical Society</copyright>
		<narrator>Neil McCracken</narrator>
		<contact>Neil McCracken, Amber Mosley</contact>
		<contact-email>namccrac@iu.edu, almosley@iu.edu</contact-email>
		<author-list>
			<author>Amber L. Mosley</author>
		</author-list>
	</article>
	<slides height-width-ratio=".75">
		<slide audio-time="27">
			<subtitle/>
		</slide>
		<slide audio-time="112">
			<subtitle/>
		</slide>
		<slide audio-time="125">
			<subtitle/>
		</slide>
		<slide audio-time="91">
			<subtitle/>
		</slide>
		<slide audio-time="54">
			<subtitle/>
		</slide>
		<slide audio-time="43">
			<subtitle/>
		</slide>
		<slide audio-time="50">
			<subtitle/>
		</slide>
	</slides>
	<audio duration="502"/>
</presentation>
